# Supplementary material
Source: PubMed Central journal article supplement (PMC4962624)
Supplement: IAI.00098-16_zii999091776so1.pdf [file IAI.00098-16_zii999091776so1.pdf]

**Table S1.** Oligonucleotides used in this study <sup>#</sup>.

| Primer name              | Sequence (5'-to-3')*         | Restriction site | Use                                              |
|--------------------------|------------------------------|------------------|--------------------------------------------------|
| <i>hasR</i> mut_UP_FW    | GCTCTAGAGCCTGCGCTACAGCG      | <i>Xba</i> I     | Generation of the pDM4Δ <i>hasR</i> construct    |
| <i>hasR</i> mut_UP_RV    | CGGAATTCCGCCCGTCTTGCGC       | <i>Eco</i> RI    | Generation of the pDM4Δ <i>hasR</i> construct    |
| <i>hasR</i> mut_DOWN_FW  | CGGAATTCTGTTCAAGACCGCCTG     | <i>Eco</i> RI    | Generation of the pDM4Δ <i>hasR</i> construct    |
| <i>hasR</i> mut_DOWN_RV  | CCGCTCGAGTGGTGAATGCCGGAGC    | <i>Xho</i> I     | Generation of the pDM4Δ <i>hasR</i> construct    |
| <i>phuR</i> mut_UP_FW    | GCTCTAGAAAGGCTGGGAGTGCTGC    | <i>Xba</i> I     | Generation of the pDM4Δ <i>phuR</i> construct    |
| <i>phuR</i> mut_UP_RV    | CGGAATTCCGACCCCGTGCATCTGC    | <i>Eco</i> RI    | Generation of the pDM4Δ <i>phuR</i> construct    |
| <i>phuR</i> mut_DOWN_FW  | CGGAATTCGGCGCGCCGAGGG        | <i>Eco</i> RI    | Generation of the pDM4Δ <i>phuR</i> construct    |
| <i>phuR</i> mut_DOWN_RV  | CCGCTCGAGAGGGACACAGGTGGATC   | <i>Xho</i> I     | Generation of the pDM4Δ <i>phuR</i> construct    |
| <i>feoB</i> mut_UP_FW    | CGGAATTCTCGGTACCCGCCAG       | <i>Eco</i> RI    | Generation of the pEXΔ <i>feoB</i> construct     |
| <i>feoB</i> mut_UP_RV    | CGGGATCCACCACGTTGACCAGC      | <i>Bam</i> HI    | Generation of the pEXΔ <i>feoB</i> construct     |
| <i>feoB</i> mut_DOWN_FW  | CGGGATCCTGATGACCTGCCTG       | <i>Bam</i> HI    | Generation of the pEXΔ <i>feoB</i> construct     |
| <i>feoB</i> mut_DOWN_RV  | GGGAAGCTTCGGCGGACCCTACATC    | <i>Hind</i> III  | Generation of the pEXΔ <i>feoB</i> construct     |
| <i>tonB1</i> mut_UP_FW   | GCTCTAGAACCGTCTGTCCGGACTG    | <i>Xba</i> I     | Generation of the pDM4Δ <i>tonB</i> construct    |
| <i>tonB1</i> mut_UP_RV   | CGGAATTCGGGATCGCTGCCGTG      | <i>Eco</i> RI    | Generation of the pDM4Δ <i>tonB</i> construct    |
| <i>tonB1</i> mut_DOWN_FW | CGGAATTCTTCTCAAGATCGAGAAGC   | <i>Eco</i> RI    | Generation of the pDM4Δ <i>tonB</i> construct    |
| <i>tonB1</i> mut_DOWN_RV | CCGCTCGAGCGTCGGCCTGGAGAG     | <i>Xho</i> I     | Generation of the pDM4Δ <i>tonB</i> construct    |
| <i>fpvR</i> mut_UP_FW    | GCTCTAGAAGGAACTGCGGCAGATG    | <i>Xba</i> I     | Generation of the pDM4Δ <i>fpvR</i> construct    |
| <i>fpvR</i> mut_UP_RV    | CGGAATTCGGCGTGCAGGCGCATG     | <i>Eco</i> RI    | Generation of the pDM4Δ <i>fpvR</i> construct    |
| <i>fpvR</i> mut_DOWN_FW  | CGGAATTCGCAGCCTGGTCGACG      | <i>Eco</i> RI    | Generation of the pDM4Δ <i>fpvR</i> construct    |
| <i>fpvR</i> mut_DOWN_RV  | CCGCTCGAGGGTGTACTGGGCAC      | <i>Xho</i> I     | Generation of the pDM4Δ <i>fpvR</i> construct    |
| <i>pvdA</i> compl FW     | CCGGAATTCGATTCGCTATTCGTGCTCG | <i>Eco</i> RI    | Generation of the pUCP <i>pvdA</i> construct     |
| <i>pvdA</i> compl RV     | CCCAAGCTTCTGGCGGGAAACGGGC    | <i>Hind</i> III  | Generation of the pUCP <i>pvdA</i> construct     |
| <i>pchD</i> compl FW     | CCGGAATTCGATGGTCATCAGTTTTTCT | <i>Eco</i> RI    | Generation of the pUCP <i>pchD</i> construct     |
| <i>pchD</i> compl RV     | CCCAAGCTTCGGCAGGCGTTCGCTCC   | <i>Hind</i> III  | Generation of the pUCP <i>pchD</i> construct     |
| <i>tonB1</i> compl FW    | CCGGAATTCGGACGGCCAGTTCGCC    | <i>Eco</i> RI    | Generation of the pUCP <i>tonB1</i> construct    |
| <i>tonB1</i> compl RV    | CCCAAGCTTCGCTCGAAGGCGCGGC    | <i>Hind</i> III  | Generation of the pUCP <i>tonB1</i> construct    |
| <i>phuR</i> compl FW     | CCGGAATTCGAAAGGCTGGGAGTGCTG  | <i>Eco</i> RI    | Generation of the pUCP <i>phuRhasR</i> construct |
| <i>phuR</i> compl RV     | CGGGGTACCACCTGTGGCATGGAAAGC  | <i>Kpn</i> I     | Generation of the pUCP <i>phuRhasR</i> construct |

|                      |                                          |                |                                                            |
|----------------------|------------------------------------------|----------------|------------------------------------------------------------|
| <i>hasR</i> compl FW | CGGGGT <u>ACCGGCGGGAGT</u> GACGCTGC      | <i>KpnI</i>    | Generation of the pUCP <i>phuRhasR</i> construct           |
| <i>hasR</i> compl RV | GA <u>AGATCT</u> CCTTCACTGGGCAAACGG      | <i>BglII</i>   | Generation of the pUCP <i>phuRhasR</i> construct           |
| mCherry_FW           | TATA <u>AAGCTT</u> TGGTGAGCAAGGGCGAGG    | <i>HindIII</i> | Generation of the miniCTX <i>PpvdA'</i> -mCherry construct |
| mCherry_RV           | TAT <u>GTCGACT</u> CACTTGTACAGCTCGTCCATG | <i>SalI</i>    | Generation of the miniCTX <i>PpvdA'</i> -mCherry construct |
| <i>PpvdA</i> _FW     | CGG <u>AATTC</u> CTTCTGTTGCGCAAGC        | <i>EcoRI</i>   | Generation of the miniCTX <i>PpvdA'</i> -mCherry construct |
| <i>PpvdA</i> _RV     | CCCA <u>AGCTT</u> CCTGAGTCATTCCAGTTCC    | <i>HindIII</i> | Generation of the miniCTX <i>PpvdA'</i> -mCherry construct |

<sup>#</sup> Unless otherwise stated, PCRs were performed using the genomic DNA of *P. aeruginosa* PAO1 as the template.

\*Restriction sites are underlined.

**A**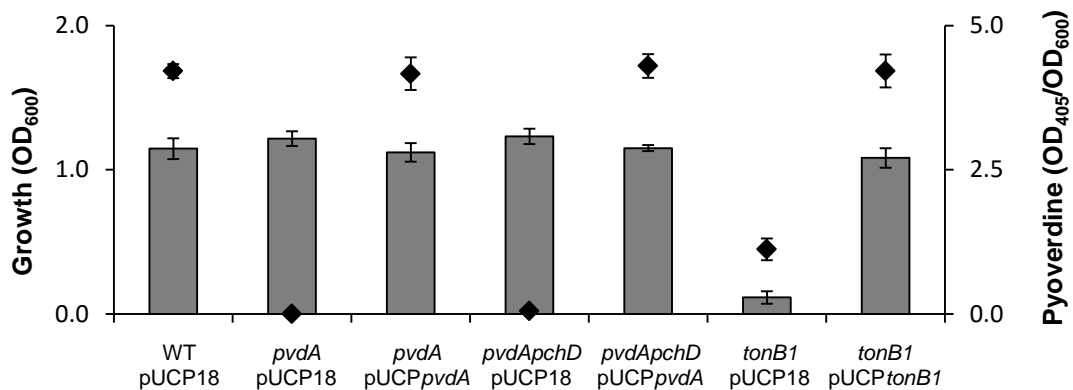**B**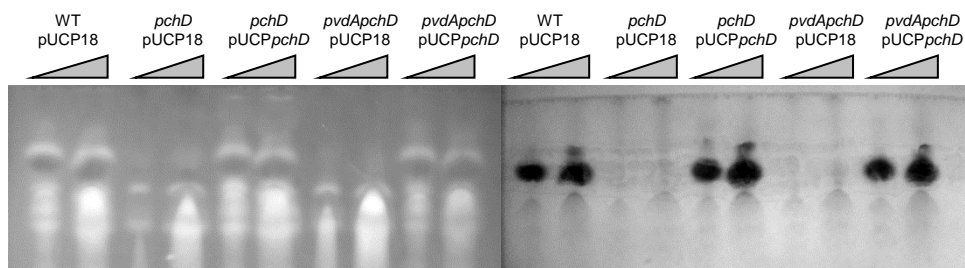**C**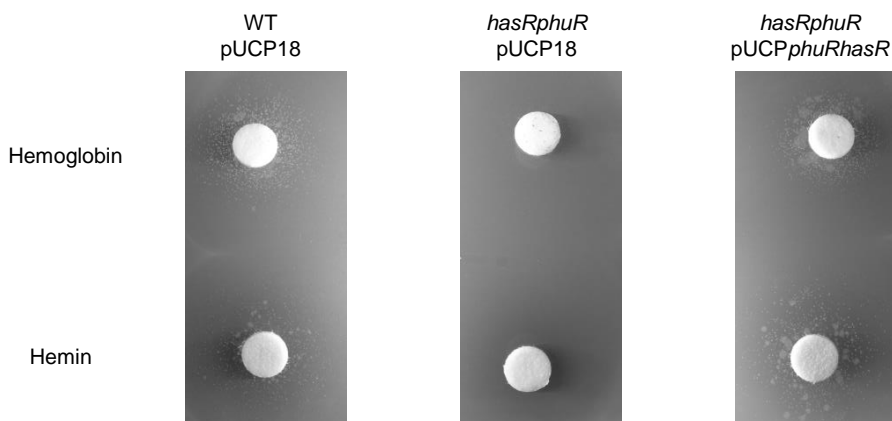

**Figure S1. Genetic complementation of different *P. aeruginosa* iron-uptake mutants.** (A) Growth (bars, left y axis) and pyoverdine production (diamonds, right y axis) of the wild type (WT) strain and of *pvdA*, *pvdApchD* and *tonB1* mutants carrying plasmids pUCP18 (empty vector), pUCP*pvdA* (containing a wild-type copy of *pvdA* with its own promoter region), or pUCP*tonB1* (containing a wild-type copy of *tonB1* with its own promoter region), as indicated. Growth was measured after 14 h in the iron-poor medium DCAA. (B) Pyochelin extracted from culture supernatants of WT, *pchD* and *pvdApchD* strains carrying plasmids pUCP18 or pUCP*pchD* (containing a wild-type copy of *pchD* with its own promoter region), after 36-h growth in GGP, and separated (2.5 or 5.0 μl of extract) by thin layer chromatography (TLC). Chromatograms are visualized by exposure to UV light (left panel) and by spraying with 100 μM FeCl<sub>3</sub> (right panel). (C) Growth of WT and *hasRphuR* strains carrying plasmids pUCP18 or pUCP*phuRhasR* (containing a wild-type copy of both *phuR* and *hasR* genes with their own promoter regions), in the presence of hemoglobin or hemin on M9 agarose plates containing 0.2% glucose and 1 mM DIP. Pictures in (B) and (C) are representative of three independent experiments giving similar results.

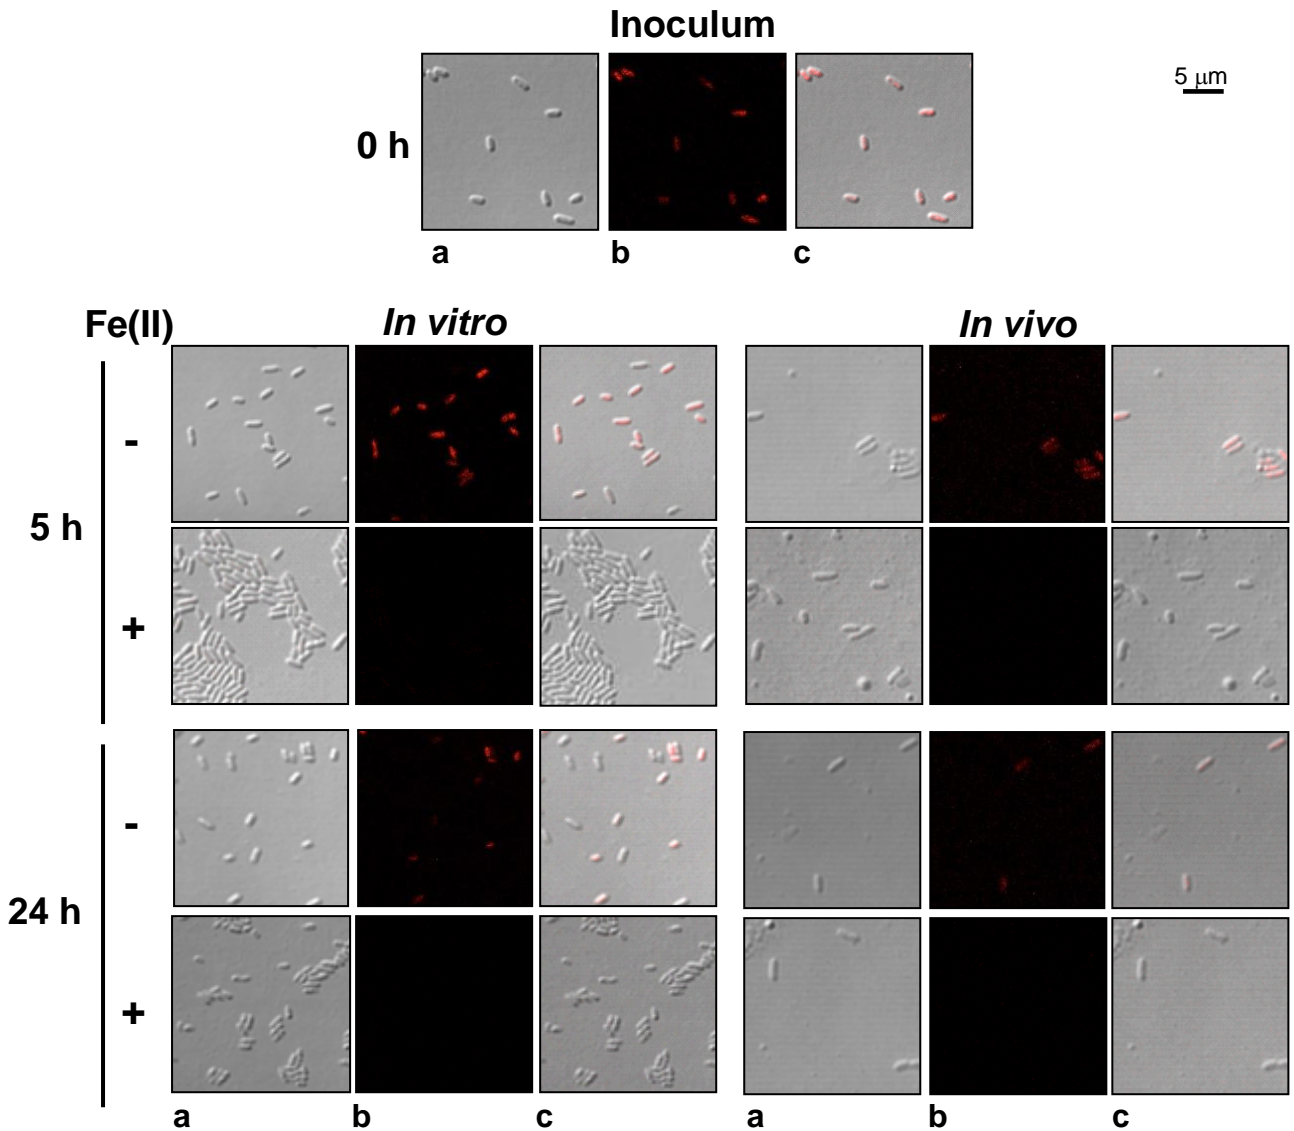

**Figure S2. PAO1 wild type perceives the mouse lung as an iron poor environment.**

Confocal microscopy images showing the *in vitro* and *in vivo* fluorescence of the PAO1 strain carrying the *PpvdA'*-mCherry fusion. Bacterial cultures were pre-grown in the iron-poor medium DCAA, observed by confocal microscopy (0 h) and diluted to obtain  $6 \times 10^7$  CFU/ml. For the *in vitro* experiment, bacteria were grown in DCAA supplemented or not with  $10 \mu\text{M}$   $\text{FeSO}_4$  and samples were analysed after 5 h and 24 h. For the *in vivo* experiment, mice were inoculated with bacterial suspension in PBS supplemented or not with  $10 \mu\text{M}$   $\text{FeSO}_4$ . After 5 h and 24 h from the infection, broncho-alveolar lavages (BAL) were performed and analysed by confocal microscopy. Panels show pictures taken under visible light at differential interference contrast (DIC) (a), the fluorescence emission upon excitation at 585 nm (b), and the overlay of visible and fluorescence images (c). Representative images are shown. A Leica SP5 Confocal Laser Scanning Microscope equipped with a 63X oil immersion objective was used.
